# Supplementary material for: Complete Plastome Sequences from Glycine syndetika and Six Additional Perennial Wild Relatives of Soybean
Source: PubMed Central journal article supplement (PMC4199708; doi:10.1534/g3.114.012690), 2014-08-25
Supplement: supp_g3.114.012690_FigureS1.pdf [file supp_g3.114.012690_FigureS1.pdf]

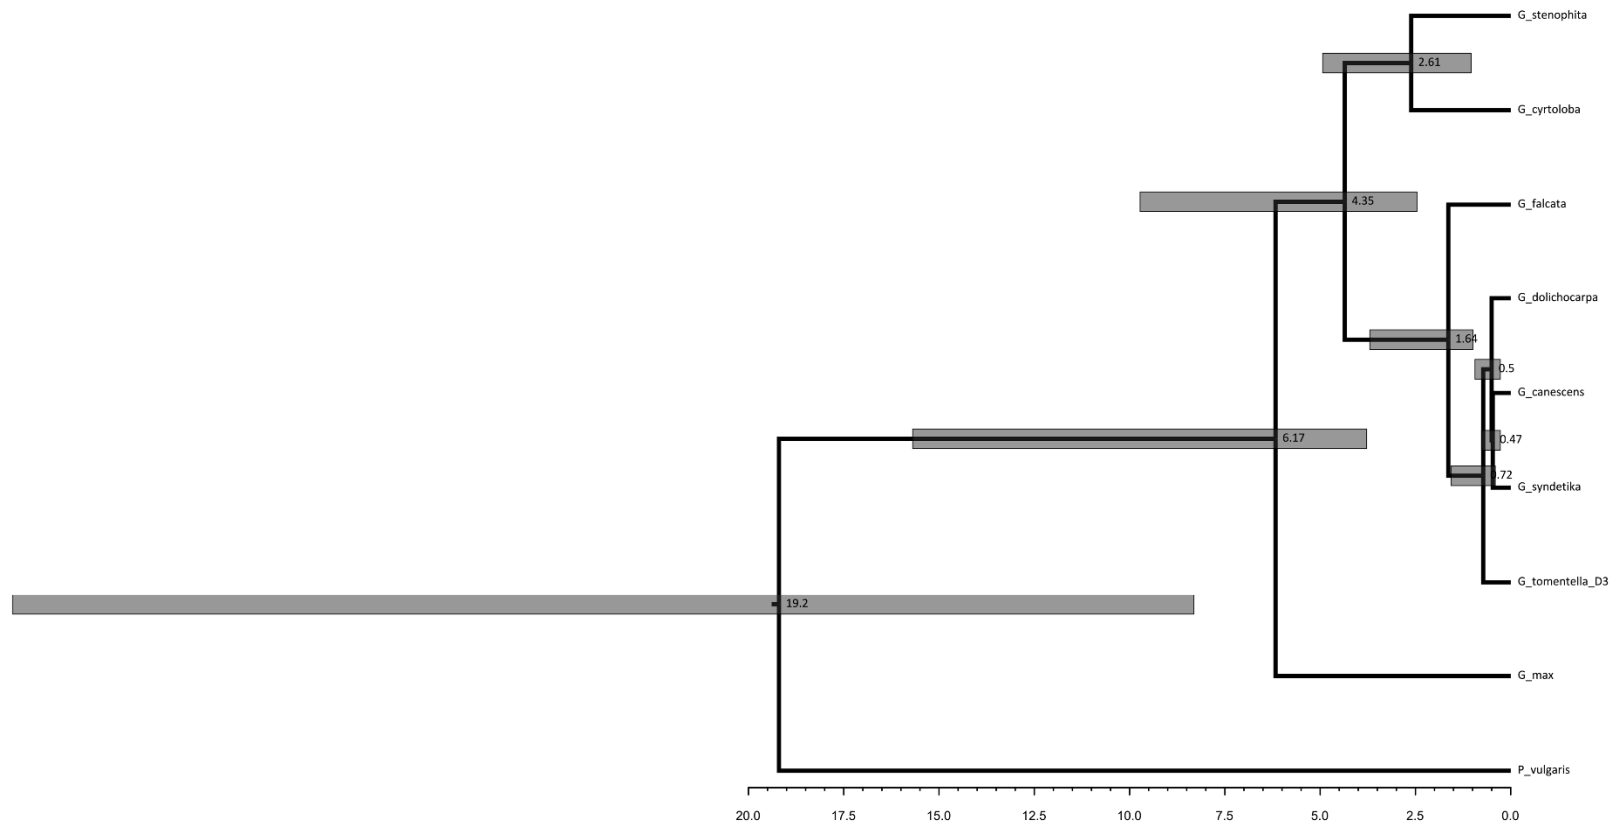

Figure S1 *Glycine* plastome tree with *Phaseolus vulgaris* as the outgroup.
