# Supplementary material for: Complete Plastome Sequences from Glycine syndetika and Six Additional Perennial Wild Relatives of Soybean
Source: PubMed Central journal article supplement (PMC4199708; doi:10.1534/g3.114.012690), 2014-08-25
Supplement: supp_g3.114.012690_TableS1.pdf [file supp_g3.114.012690_TableS1.pdf]

**Table S1 BAC library Information.** All libraries were constructed from *Hind*III digests of genomic DNA. Libraries available at Arizona Genomics Institute. Genbank sequence identifiers from direct submission

| <i>Glycine</i> species  | CSIRO Accession Numbers | AGI Library Name | coverage | Average insert size Kb | Chloroplast Clones Used | GenBank Accession Number |
|-------------------------|-------------------------|------------------|----------|------------------------|-------------------------|--------------------------|
| <i>G. syndetika</i>     | G1300                   | GS_Ba            | 12x      | 168                    | SOG52-H04               | KC893638.1               |
| <i>G. dolichocarpa</i>  | G1134                   | GD_Tba           | 11x      | 151                    | SOE258-B02              | KC893636.1               |
| <i>G. canescens</i>     | G1232                   | GC_bC            | 14x      | 146                    | SOJ90-A19               | KC893635.1               |
| <i>G. tomentella D3</i> | G1403                   | GT_Dba           | 12x      | 147                    | SOF103-N20              | KC893633.1               |
| <i>G. falcata</i>       | G1718                   | GF_BA            | 12x      | 146                    | SOI54-F07               | KC893637.1               |
| <i>G. stenophita</i>    | G1974                   | GS_ABa           | 12x      | 149                    | SOK108-O10              | KC893634.1               |
| <i>G. cyrtoloba</i>     | G1267                   | GC_Bb            | 12x      | 147                    | SOH198-B08              | KC893632.1               |
